# Supplementary material for: Disrupting LILRB4/APOE Interaction by an Efficacious Humanized Antibody Reverses T-cell Suppression and Blocks AML Development
Source: Oxford University Press journal article supplement (doi:10.1158/2326-6066.cir-19-0036), 2019-06-18
Supplement: 23266066cir190036-sup-215507_2_supp_5472544_pq9vmf.docx [file 23266066cir190036-sup-215507_2_supp_5472544_pq9vmf.docx]

**Table S2. Interaction between h128-3 Fab and LILRB4**

|  | h128-3 | LILRB4-D1 | Contacts | Total contacts1 |
| --- | --- | --- | --- | --- |
| Heavy chain | N31 | E76 | 1 | 140 |
|  | H32 | L53 | 10 |  |
|  | Y34 | E54(1)2, R56(1), P103 | 13, 8, 1 |  |
|  | F53 | L53, E54 | 4, 17 |  |
|  | S57 | E54 | 1 |  |
|  | S59 | E54(1) | 6 |  |
|  | Y61 | E54(2), P103, V104 | 11, 10, 2 |  |
|  | S103 | E76(2), K78 | 12, 9 |  |
|  | T104 | E76 | 9 |  |
|  | D106 | K78(1) | 2 |  |
|  | W107 | L53, R56, K78 | 2, 15, 7 |  |
| Light chain | N30 | R56, E57(1), N73 | 1, 5, 8 | 131 |
|  | I32 | N73 | 5 |  |
|  | Y33 | A55, R56(1), E57, P74 | 1, 22, 1, 2 |  |
|  | S92 | R56(1) | 6 |  |
|  | Y93 | R56, E57(1), R101(1), S102, P103 | 8, 10, 15, 1, 2 |  |
|  | D94 | R101(2), P103, V104 | 10, 7, 3 |  |
|  | W95 | R56, P103(2), V104 | 6, 15, 2 |  |
|  | G96 | P103 | 1 |  |

1Numbers represent the number of atom-to-atom contacts between the antibody residues and the LILRB4 residues, which were analyzed by the Contact program in CCP4 suite (the distance cutoff is 4.5 Å).

2Numbers in the parentheses represent the number of hydrogen bonds between the antibody residues and the LILRB4 residues.
