# Supplementary material for: Disrupting LILRB4/APOE Interaction by an Efficacious Humanized Antibody Reverses T-cell Suppression and Blocks AML Development
Source: Oxford University Press journal article supplement (doi:10.1158/2326-6066.cir-19-0036), 2019-06-18
Supplement: 23266066cir190036-sup-215507_2_supp_5472551_pq9vmg.docx [file 23266066cir190036-sup-215507_2_supp_5472551_pq9vmg.docx]

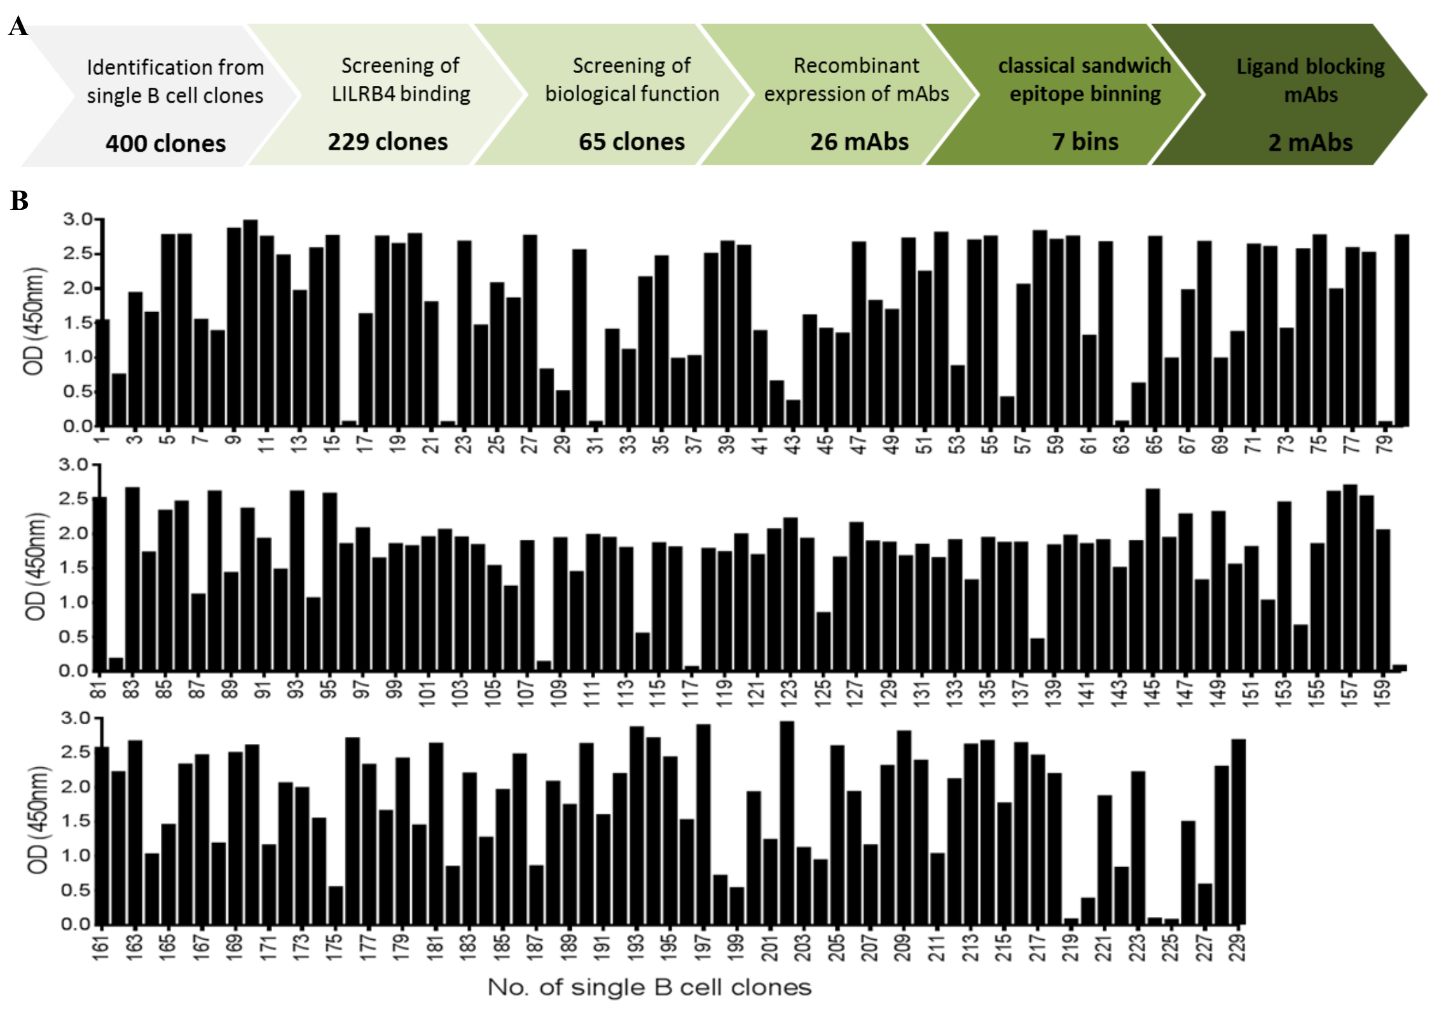


**Fig. S1. Screening of anti-LILRB4 rabbit mAbs.** (**A**) Flowchart of generation and selection of anti-LILRB4 rabbit mAbs. (**B**) Bar graphs represent LILRB4 binding signal of monoclonal antibody clones by ELISA.
