# Supplementary material for: Disrupting LILRB4/APOE Interaction by an Efficacious Humanized Antibody Reverses T-cell Suppression and Blocks AML Development
Source: Oxford University Press journal article supplement (doi:10.1158/2326-6066.cir-19-0036), 2019-06-18
Supplement: 23266066cir190036-sup-215507_2_supp_5472552_pq9vmg.docx [file 23266066cir190036-sup-215507_2_supp_5472552_pq9vmg.docx]

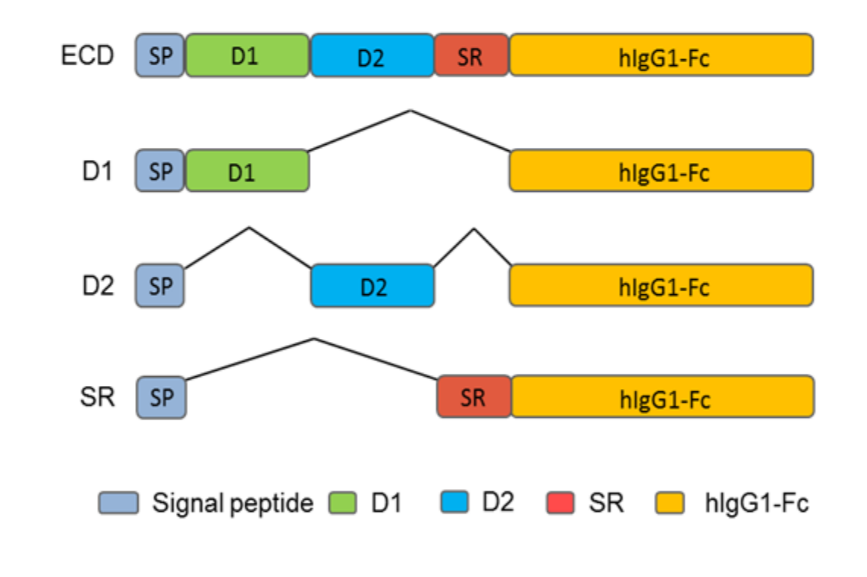


**Fig. S2. Schematic diagram showing the construction of LILRB4 fragments fused with Fc of human IgG1.** Human IgG1 heavy chain signal peptide (SP) was constructed at the 5' terminus of the recombinants to lead expressed proteins to the culture supernatant. D1 means the first Ig-like domain (residues 27-118) of LILRB4; D2 means the second Ig-like domain (residues 119-218) of LILRB4; SR means stalk region (residues 219-259) of LILRB4; ECD means full-length of extracellular domain (residues 22-259) of LILRB4.
