# Supplementary material for: Disrupting LILRB4/APOE Interaction by an Efficacious Humanized Antibody Reverses T-cell Suppression and Blocks AML Development
Source: Oxford University Press journal article supplement (doi:10.1158/2326-6066.cir-19-0036), 2019-06-18
Supplement: 23266066cir190036-sup-215507_2_supp_5472553_pq9vmg.docx [file 23266066cir190036-sup-215507_2_supp_5472553_pq9vmg.docx]

**Fig. S3. Schematic diagram of the LILRB4 chimeric receptor reporter system.** When functional ligands or mAbs bind to the ECD and activate the chimeric signaling domain, an increase in GFP expression is observed. On the other hand, when functional ligands or mAbs bind to the ECD and suppress the chimeric signaling domain, a decrease in GFP expression is observed.
